# Supplementary material for: Multiproxy approach to reconstruct fossil primate feeding behavior: Case study for macaque from the Plio-Pleistocene site Guefaït-4.2 (eastern Morocco)
Source: Frontiers journal article supplement (doi:10.3389/fevo.2023.1011208), 2023-02-28
Supplement: Table_5.XLSX [file Table_5.XLSX]

## Sheet: Supplementary Table 5
Supplementary Table 5 | Description of the 3D areal surface texture parameters used in the present study (ISO 25178 and ISO 12781).
Category	Parameter	Description (condition)	Standard	Unit
Area	Sda	Mean dale area	ISO 25178	µm 2
Area	Sha	Mean hill area	ISO 25178	µm 2
Density	Sal	Autocorrelation length (s = 0.2)	ISO 25178	mm
Density	Spd	Density of peaks	ISO 25178	1/µm 2
Spatial	Str	Texture aspect ratio (s = 0.2)	ISO 25178	n/a
Spatial	Std	Texture direction	ISO 25178	n/a
Height	S10z	Ten-point height	ISO 25178	µm
Height	S5p	Five-point peak height	ISO 25178	µm
Height	S5v	Five-point pit height	ISO 25178	µm
Height	Sa	Arithmetic mean height or mean surface roughness	ISO 25178	µm
Height	Sku	Kurtosis of height distribution of surface	ISO 25178	n/a
Height	Sp	Maximum peak height, height between the highest peak and the mean plane	ISO 25178	µm
Height	Sq	Root-mean-square height, Standard deviation of the height distribution	ISO 25178	µm
Height	Ssk	Skewness of height distribution of surface	ISO 25178	n/a
Height	Sv	Maximum pit height, depth between the mean plane and the deepest valley.	ISO 25178	µm
Height	Sxp	Extreme peak height, difference in height between the q and p material ratio (p = 50%, q = 97.5%)	ISO 25178	µm
Height	Sz	Maximum height, height between the highest peak and the deepest valley	ISO 25178	µm
Height	FLTt	Peak to valley ﬂatness deviation of the surface (Gaussian Filter, 0.025 mm)	ISO 12781	µm
Height	FLTp	Peak to reference ﬂatness deviation (Gaussian Filter, 0.025 mm)	ISO 12781	µm
Height	FLTv	Reference to valley ﬂatness deviation (Gaussian Filter, 0.025 mm)	ISO 12781	µm
Height	FLTq	Root mean square ﬂatness deviation (Gaussian Filter, 0.025 mm)	ISO 12781	µm
Hybrid	Sdq	Root mean square gradient of the surface	ISO 25178	n/a
Hybrid	Sdr	Developed interfacial area ratio	ISO 25178	%
Peak sharpness	Spc	Arithmetic mean peak curvature	ISO 25178	1/µm
Plateau size	Smc	Inverse areal material ratio (p = 10%)	ISO 25178	µm
Material ratio	Sk	Core roughness depth. Height of the core material	ISO 25178	µm
Material ratio	Spk	Reduced peak height, Mean height of the peaks above the core material	ISO 25178	µm
Material ratio	Svk	Reduced pit depth, Mean depth of the valleys below the core material	ISO 25178	µm
Material ratio	Smr1	Surface bearing area ratio (the proportion of the surface which consists of peaks above the core material)	ISO 25178	%
Material ratio	Smr2	Surface bearing area ratio (the proportion of the surface which would carry the load)	ISO 25178	%
Volume	Sdv	Mean dale volume	ISO 25178	µm 3
Volume	Shv	Mean hill volume	ISO 25178	µm 3
Volume	Vm	Material volume at a given material ratio (p = 10%)	ISO 25178	µm3/µm 2
Volume	Vmc	Material volume of the core at a given material ratio (p = 10%, q = 80%)	ISO 25178	µm3/µm 2
Volume	Vmp	Material volume of the peaks of the surface	ISO 25178	µm3/µm 2
Volume	Vv	Void volume at a given material ratio (p = 10%)	ISO 25178	µm 3/µm 2
Volume	Vvc	Void volume of the core (p = 10%, q = 80%)	ISO 25178	µm3/µm 2
Volume	Vvv	Void volume of the pit at a given material ratio (p = 80%)	ISO 25178	µm3/µm 2
n/a = no unit
